# Supplementary material
Source: PubMed Central journal article supplement (PMC6274622)
Supplement: NIHMS970577-supplement-supplement_1.pdf [file NIHMS970577-supplement-supplement_1.pdf]

**Supplemental Table S1.** Metabolites, enzymes, and hormones analyzed from newborn screening blood spots.

|                                                 |                                                        |
|-------------------------------------------------|--------------------------------------------------------|
| Free carnitine umol/L (C0)                      | <b><u>Amino Acids (umol/L)</u></b>                     |
| <b><u>Acylcarnitines (umol/L)</u></b>           | Arginine (ARG)                                         |
| Acetylcarnitine (C2)                            | Argininosuccinate (ASA)                                |
| Propionylcarnitine (C3)                         | Citrulline (CIT)                                       |
| Butyrylcarnitine+Isobutyrylcarnitine (C4)       | Glycine (GLY)                                          |
| Isovalerylcarnitine+Methylbutyrylcarnitine (C5) | Leucine (LEU)                                          |
| Tiglylcarnitine (C5:1)                          | Methionine (MET)                                       |
| Hexanoylcarnitine (C6)                          | Ornithine (ORN)                                        |
| Methylglutaryl carnitine (C6-DC)                | Phenylalanine (PHE)                                    |
| Octanoylcarnitine (C8)                          | Succinylacetone (SUAC)                                 |
| Decanoylcarnitine (C10)                         | Tyrosine (TYR)                                         |
| Decenoylcarnitine (C10:1)                       | Valine (VAL)                                           |
| Decadienoylcarnitine (C10:2)                    | <b><u>Enzymes and Hormones</u></b>                     |
| Tetradecanoylcarnitine (C14)                    | 17-Hydroxyprogesterone (17-OHP- ng/mL)                 |
| Tetradecenoylcarnitine (C14:1)                  | Biotinidase (U/dL)                                     |
| 3-Hydroxytetradecanoylcarnitine (C14-OH)        | Galactose-1-phosphate uridyl transferase (GALT- U/gHb) |
| Palmitoylcarnitine (C16)                        | Thyroid Stimulating Hormone (TSH- U/mL)                |
| Palmitoleylcarnitine (C16:1)                    |                                                        |
| 3-Hydroxypalmitoylcarnitine (C16-OH)            |                                                        |
| Stearoylcarnitine (C18)                         |                                                        |
| Oleoylcarnitine (C18:1)                         |                                                        |
| 3-Hydroxyoleoylcarnitine (C18:1-OH)             |                                                        |
| Linoleoylcarnitine (C18:2)                      |                                                        |

**Supplemental Table S2.** Correlation between carnitine (acyl and free) values.

|          | C0 | C2   | C3   | C4   | C5   | C5:1 | C6   | C6-DC | C8   | C10  | C10:1 | C10:2 | C14  | C14:1  | C14-OH | C16   | C16:1 | C16-OH | C18   | C18:1  | C18:1-OH | C18:2 |
|----------|----|------|------|------|------|------|------|-------|------|------|-------|-------|------|--------|--------|-------|-------|--------|-------|--------|----------|-------|
| C0       | -- | 0.62 | 0.57 | 0.35 | 0.43 | 0.12 | 0.24 | 0.05  | 0.14 | 0.04 | 0.13  | 0.09  | 0.31 | -0.03  | -0.04  | 0.38  | 0.32  | 0.03   | 0.42  | 0.55   | 0.36     | 0.56  |
| C2       |    | --   | 0.58 | 0.44 | 0.30 | 0.16 | 0.47 | 0.28  | 0.37 | 0.33 | 0.14  | 0.03  | 0.62 | 0.39   | 0.30   | 0.72  | 0.65  | 0.39   | 0.59  | 0.66   | 0.49     | 0.25  |
| C3       |    |      | --   | 0.47 | 0.43 | 0.21 | 0.32 | 0.11  | 0.13 | 0.06 | 0.05  | 0.05  | 0.39 | 0.16   | 0.05   | 0.45  | 0.42  | 0.14   | 0.36  | 0.44   | 0.29     | 0.32  |
| C4       |    |      |      | --   | 0.57 | 0.21 | 0.45 | 0.14  | 0.29 | 0.23 | 0.09  | 0.10  | 0.45 | 0.29   | 0.20   | 0.43  | 0.40  | 0.29   | 0.38  | 0.39   | 0.31     | 0.16  |
| C5       |    |      |      |      | --   | 0.18 | 0.35 | 0.02  | 0.17 | 0.06 | 0.12  | 0.18  | 0.22 | <-0.01 | -0.01  | 0.18  | 0.07  | 0.04   | 0.26  | 0.28   | 0.15     | 0.37  |
| C5:1     |    |      |      |      |      | --   | 0.15 | 0.13  | 0.13 | 0.11 | 0.07  | 0.08  | 0.17 | 0.12   | 0.14   | 0.16  | 0.13  | 0.15   | 0.11  | 0.08   | 0.11     | 0.03  |
| C6       |    |      |      |      |      |      | --   | 0.31  | 0.70 | 0.61 | 0.36  | 0.13  | 0.56 | 0.47   | 0.39   | 0.46  | 0.44  | 0.45   | 0.40  | 0.35   | 0.40     | 0.02  |
| C6-DC    |    |      |      |      |      |      |      | --    | 0.39 | 0.46 | 0.29  | 0.15  | 0.36 | 0.44   | 0.40   | 0.30  | 0.40  | 0.37   | 0.12  | 0.18   | 0.27     | -0.23 |
| C8       |    |      |      |      |      |      |      |       | --   | 0.87 | 0.49  | 0.15  | 0.58 | 0.64   | 0.59   | 0.40  | 0.49  | 0.55   | 0.28  | 0.26   | 0.41     | -0.15 |
| C10      |    |      |      |      |      |      |      |       |      | --   | 0.45  | 0.11  | 0.62 | 0.77   | 0.70   | 0.41  | 0.55  | 0.63   | 0.26  | 0.23   | 0.42     | -0.29 |
| C10:1    |    |      |      |      |      |      |      |       |      |      | --    | 0.33  | 0.19 | 0.24   | 0.22   | 0.09  | 0.10  | 0.16   | 0.05  | 0.08   | 0.14     | 0.12  |
| C10:2    |    |      |      |      |      |      |      |       |      |      |       | --    | 0.02 | 0.01   | 0.02   | -0.01 | -0.03 | 0.02   | -0.05 | <-0.01 | <-0.01   | 0.11  |
| C14      |    |      |      |      |      |      |      |       |      |      |       |       | --   | 0.79   | 0.67   | 0.80  | 0.84  | 0.74   | 0.57  | 0.54   | 0.60     | -0.02 |
| C14:1    |    |      |      |      |      |      |      |       |      |      |       |       |      | --     | 0.82   | 0.54  | 0.76  | 0.79   | 0.31  | 0.30   | 0.50     | -0.37 |
| C14-OH   |    |      |      |      |      |      |      |       |      |      |       |       |      |        | --     | 0.45  | 0.61  | 0.75   | 0.26  | 0.21   | 0.46     | -0.36 |
| C16      |    |      |      |      |      |      |      |       |      |      |       |       |      |        |        | --    | 0.82  | 0.60   | 0.74  | 0.66   | 0.57     | 0.06  |
| C16:1    |    |      |      |      |      |      |      |       |      |      |       |       |      |        |        |       | --    | 0.69   | 0.49  | 0.57   | 0.59     | -0.12 |
| C16-OH   |    |      |      |      |      |      |      |       |      |      |       |       |      |        |        |       |       | --     | 0.36  | 0.28   | 0.52     | -0.32 |
| C18      |    |      |      |      |      |      |      |       |      |      |       |       |      |        |        |       |       |        | --    | 0.84   | 0.64     | 0.34  |
| C18:1    |    |      |      |      |      |      |      |       |      |      |       |       |      |        |        |       |       |        |       | --     | 0.68     | 0.47  |
| C18:1-OH |    |      |      |      |      |      |      |       |      |      |       |       |      |        |        |       |       |        |       |        | --       | 0.12  |
| C18:2    |    |      |      |      |      |      |      |       |      |      |       |       |      |        |        |       |       |        |       |        |          | --    |

| Cell Legend:                  | Spearman Correlation Coefficient |
|-------------------------------|----------------------------------|
| <b>Correlation Color Code</b> |                                  |
| $r \leq -0.7$                 | Negative                         |
| $\geq -0.7$ $r < -0.5$        |                                  |
| $\geq -0.5$ $r < -0.3$        |                                  |
| $\geq -0.3$ $r < 0$           |                                  |
| $> 0$ $r < 0.3$               | Positive                         |
| $\geq 0.3$ $r < 0.5$          |                                  |
| $\geq 0.5$ $r < 0.7$          |                                  |
| $r \geq 0.7$                  |                                  |

**Supplemental Table S3.** Comparison of newborn screening metabolites between number of wheezing episodes in the past 12 months for the 1-year study visit.

| Metabolite                     | No Wheezing Episodes<br>Median (IQR) | 1-3 Wheezing Episodes<br>Median (IQR) | 4-12 Wheezing Episodes<br>Median (IQR) | >12 Wheezing Episodes<br>Median (IQR) | OR<br>(95% CI)   | p-value |
|--------------------------------|--------------------------------------|---------------------------------------|----------------------------------------|---------------------------------------|------------------|---------|
| <b>Sample Size<sup>†</sup></b> | <b>1,291 (73.3%)</b>                 | <b>353 (20.1%)</b>                    | <b>85 (4.8%)</b>                       | <b>32 (1.8%)</b>                      |                  |         |
| Free carnitine (C0)            | 18.00 (13.84-23.00)                  | 18.20 (14.19-22.81)                   | 19.02 (14.63-23.97)                    | 21.45 (15.31-25.40)                   | 1.22 (0.92-1.61) | 0.166   |
| Total carnitine (TC)           | 47.01 (38.29-58.16)                  | 47.41 (39.69-58.07)                   | 47.29 (39.79-56.84)                    | 51.72 (37.41-58.47)                   | 1.09 (0.78-1.52) | 0.616   |
| <b>Acylcarnitines</b>          |                                      |                                       |                                        |                                       |                  |         |
| Short-chain (SC)               | 0.49 (0.45-0.53)                     | 0.49 (0.46-0.53)                      | 0.48 (0.45-0.52)                       | 0.47 (0.45-0.51)                      | 0.69 (0.34-1.43) | 0.321   |
| C2                             | 21.33 (16.95-27.00)                  | 21.25 (17.14-26.60)                   | 20.50 (16.86-26.00)                    | 20.79 (15.44-26.00)                   | 0.98 (0.74-1.29) | 0.858   |
| C3                             | 1.41 (1.06-1.84)                     | 1.46 (1.17-1.91)                      | 1.41 (1.09-1.82)                       | 1.42 (1.13-1.83)                      | 1.32 (1.02-1.72) | 0.036*  |
| C4                             | 0.21 (0.17-0.26)                     | 0.21 (0.17-0.28)                      | 0.20 (0.16-0.25)                       | 0.21 (0.17-0.27)                      | 1.09 (0.82-1.45) | 0.551   |
| C5                             | 0.08 (0.06-0.10)                     | 0.09 (0.07-0.11)                      | 0.08 (0.07-0.11)                       | 0.09 (0.07-0.12)                      | 1.42 (1.07-1.89) | 0.016*  |
| C5:1                           | 0.01 (0.01-0.01)                     | 0.01 (0.01-0.01)                      | 0.01 (0.01-0.01)                       | 0.01 (0.01-0.01)                      | 1.42 (0.42-4.81) | 0.574   |
| Medium-chain (MC)              | 0.005 (0.004-0.007)                  | 0.005 (0.004-0.007)                   | 0.005 (0.004-0.006)                    | 0.005 (0.004-0.006)                   | 1.03 (0.77-1.38) | 0.844   |
| C6                             | 0.04 (0.04-0.06)                     | 0.05 (0.04-0.06)                      | 0.05 (0.04-0.05)                       | 0.05 (0.03-0.05)                      | 1.20 (0.89-1.62) | 0.244   |
| C6-DC                          | 0.10 (0.08-0.12)                     | 0.10 (0.08-0.13)                      | 0.10 (0.08-0.12)                       | 0.10 (0.08-0.12)                      | 1.40 (1.00-1.96) | 0.053   |
| C8                             | 0.06 (0.05-0.07)                     | 0.06 (0.05-0.07)                      | 0.06 (0.05-0.08)                       | 0.06 (0.04-0.08)                      | 1.11 (0.84-1.47) | 0.476   |
| C10                            | 0.08 (0.06-0.11)                     | 0.08 (0.06-0.11)                      | 0.08 (0.06-0.11)                       | 0.10 (0.06-0.11)                      | 0.96 (0.75-1.22) | 0.733   |
| C10:1                          | 0.05 (0.04-0.06)                     | 0.05 (0.04-0.06)                      | 0.05 (0.04-0.06)                       | 0.05 (0.04-0.06)                      | 1.37 (0.94-2.00) | 0.100   |
| C10:2                          | 0.01 (0.01-0.01)                     | 0.01 (0.01-0.01)                      | 0.01 (0.01-0.01)                       | 0.01 (0.01-0.01)                      | 1.82 (0.97-3.42) | 0.061   |
| Long-chain (LC)                | 0.12 (0.10-0.13)                     | 0.11 (0.10-0.13)                      | 0.11 (0.10-0.13)                       | 0.11 (0.09-0.12)                      | 0.76 (0.48-1.21) | 0.255   |
| C14                            | 0.22 (0.17-0.27)                     | 0.22 (0.18-0.27)                      | 0.21 (0.17-0.26)                       | 0.21 (0.16-0.23)                      | 1.05 (0.78-1.42) | 0.736   |
| C14:1                          | 0.13 (0.09-0.17)                     | 0.12 (0.09-0.17)                      | 0.12 (0.09-0.16)                       | 0.10 (0.07-0.14)                      | 0.91 (0.73-1.14) | 0.412   |
| C14-OH                         | 0.02 (0.01-0.02)                     | 0.01 (0.01-0.02)                      | 0.01 (0.01-0.02)                       | 0.01 (0.01-0.02)                      | 0.88 (0.69-1.12) | 0.301   |
| C16                            | 2.83 (2.27-3.46)                     | 2.80 (2.23-3.42)                      | 2.68 (2.24-3.45)                       | 2.39 (2.03-2.94)                      | 0.89 (0.67-1.17) | 0.400   |
| C16:1                          | 0.21 (0.16-0.27)                     | 0.21 (0.16-0.27)                      | 0.20 (0.15-0.26)                       | 0.18 (0.13-0.22)                      | 0.94 (0.75-1.18) | 0.586   |
| C16-OH                         | 0.02 (0.02-0.03)                     | 0.02 (0.02-0.03)                      | 0.02 (0.02-0.02)                       | 0.02 (0.01-0.02)                      | 0.88 (0.69-1.14) | 0.333   |
| C18                            | 0.78 (0.62-0.96)                     | 0.76 (0.60-0.97)                      | 0.76 (0.63-0.87)                       | 0.73 (0.56-0.97)                      | 0.93 (0.68-1.27) | 0.649   |
| C18:1                          | 1.15 (0.93-1.42)                     | 1.17 (0.92-1.42)                      | 1.15 (0.95-1.38)                       | 1.17 (0.86-1.43)                      | 1.08 (0.79-1.47) | 0.629   |
| C18:1-OH                       | 0.02 (0.01-0.02)                     | 0.02 (0.01-0.02)                      | 0.02 (0.01-0.02)                       | 0.02 (0.01-0.02)                      | 0.97 (0.74-1.28) | 0.836   |
| C18:2                          | 0.15 (0.11-0.22)                     | 0.17 (0.12-0.24)                      | 0.16 (0.13-0.22)                       | 0.20 (0.12-0.27)                      | 1.38 (1.12-1.71) | 0.003*  |
| Total hydroxy (total OH)       | 0.05 (0.04-0.07)                     | 0.05 (0.04-0.07)                      | 0.05 (0.04-0.06)                       | 0.05 (0.04-0.06)                      | 0.91 (0.68-1.22) | 0.538   |
| <b>Amino Acids</b>             |                                      |                                       |                                        |                                       |                  |         |
| Arginine (ARG)                 | 8.0 (6.0-11.0)                       | 8.0 (5.0-11.0)                        | 9.0 (6.0-12.0)                         | 9.0 (6.0-15.0)                        | 1.01 (0.83-1.24) | 0.911   |
| Argininosuccinate (ASA)        | 0.06 (0.05-0.08)                     | 0.07 (0.05-0.09)                      | 0.07 (0.05-0.09)                       | 0.06 (0.05-0.08)                      | 1.38 (1.06-1.79) | 0.017*  |
| Citrulline (CIT)               | 12.0 (10.0-15.0)                     | 12.0 (10.0-15.0)                      | 12.0 (10.0-15.0)                       | 12.0 (8.0-17.0)                       | 0.85 (0.59-1.24) | 0.405   |
| Glycine (GLY)                  | 382.0 (328.0-440.0)                  | 387.0 (337.0-449.0)                   | 381.0 (324.0-462.0)                    | 387.0 (299.0-486.0)                   | 1.33 (0.85-2.07) | 0.211   |
| Leucine (LEU)                  | 88.0 (76.0-103.0)                    | 91.0 (78.0-107.0)                     | 92.0 (76.0-106.0)                      | 91.0 (79.0-114.0)                     | 1.76 (1.14-2.73) | 0.011*  |
| Methionine (MET)               | 19.0 (16.0-22.0)                     | 19.0 (16.0-22.0)                      | 19.0 (17.0-22.0)                       | 19.0 (16.0-24.0)                      | 1.13 (0.73-1.74) | 0.595   |
| Ornithine (ORN)                | 65.0 (55.0-81.0)                     | 67.0 (56.0-81.0)                      | 68.0 (55.0-86.0)                       | 74.5 (53.0-91.0)                      | 1.34 (0.93-1.92) | 0.118   |
| Phenylalanine (PHE)            | 49.0 (44.0-55.0)                     | 50.0 (44.0-56.0)                      | 48.0 (42.0-56.0)                       | 47.0 (43.0-53.0)                      | 1.31 (0.64-1.99) | 0.668   |
| Succinylacetone (SUAC)         | 0.39 (0.34-0.46)                     | 0.40 (0.35-0.47)                      | 0.41 (0.35-0.47)                       | 0.41 (0.33-0.48)                      | 1.39 (0.90-2.14) | 0.135   |
| Tyrosine (TYR)                 | 78.0 (62.0-98.0)                     | 79.0 (62.0-99.0)                      | 74.0 (55.0-100.0)                      | 74.0 (61.0-106.0)                     | 0.92 (0.69-1.22) | 0.561   |
| Valine (VAL)                   | 85.0 (72.0-100.5)                    | 87.0 (74.0-103.0)                     | 86.0 (69.0-104.0)                      | 91.5 (76.0-103.0)                     | 1.25 (0.82-1.89) | 0.301   |
| <b>Enzymes and Hormones</b>    |                                      |                                       |                                        |                                       |                  |         |
| 17-OHP                         | 6.0 (4.0-8.0)                        | 6.0 (4.0-8.0)                         | 6.0 (4.0-8.0)                          | 6.0 (3.0-7.0)                         | 0.98 (0.79-1.22) | 0.853   |
| Biotinidase                    | 128.0 (107.0-149.0)                  | 125.0 (107.0-148.0)                   | 133.0 (112.0-158.0)                    | 137.0 (112.0-157.0)                   | 1.06 (0.72-1.57) | 0.769   |
| GALT                           | 209.8 (154.0-271.8)                  | 199.9 (148.9-266.5)                   | 211.5 (150.2-260.5)                    | 177.3 (131.6-234.5)                   | 0.82 (0.64-1.05) | 0.122   |
| TSH                            | 8.0 (5.0-11.0)                       | 8.0 (5.0-12.0)                        | 9.0 (6.0-13.0)                         | 7.0 (5.0-10.0)                        | 1.09 (0.92-1.29) | 0.310   |

IQR= Interquartile range (Q1 (25%)- Q3 (75%))

Odds ratios and p-values were estimated using separate ordinal logistic regression models.

<sup>†</sup> n=1,761 (90.3% of baseline population) responded to questions pertaining to the wheezing outcome on the 1-year INSPIRE questionnaire.\*Marginally significant (0.001 <  $\alpha$  < 0.05); \*\*Significant (Bonferroni correction < 0.001)

NOTE: Median (IQR) were calculated using non-transformed variables. Ordinal logistic regression was performed using log-transformed variables.

**Supplemental Table S4.** Comparison of newborn screening metabolites between number of wheezing episodes in the past 12 months for the 2-year study visit.

| <b>Metabolite</b>              | <b>No Wheezing Episodes</b><br>Median (IQR) | <b>1-3 Wheezing Episodes</b><br>Median (IQR) | <b>4-12 Wheezing Episodes</b><br>Median (IQR) | <b>&gt;12 Wheezing Episodes</b><br>Median (IQR) | <b>OR</b><br>(95% CI) | <b>p-value</b>           |
|--------------------------------|---------------------------------------------|----------------------------------------------|-----------------------------------------------|-------------------------------------------------|-----------------------|--------------------------|
| <b>Sample Size<sup>†</sup></b> | <b>1,278 (76.4%)</b>                        | <b>293 (17.5%)</b>                           | <b>84 (5.0%)</b>                              | <b>18 (1.1%)</b>                                |                       |                          |
| Free carnitine (CO)            | 18.11 (13.89-22.66)                         | 18.36 (14.28-24.32)                          | 18.08 (13.74-23.21)                           | 21.17 (16.90-29.16)                             | 1.28 (0.95-1.72)      | 0.108                    |
| Total carnitine (TC)           | 46.97 (38.55-57.89)                         | 47.38 (39.81-58.46)                          | 50.14 (37.00-57.17)                           | 52.22 (43.17-66.33)                             | 1.17 (0.82-1.67)      | 0.390                    |
| <b>Acylcarnitines</b>          |                                             |                                              |                                               |                                                 |                       |                          |
| Short-chain (SC)               | 0.49 (0.46-0.53)                            | 0.49 (0.46-0.52)                             | 0.49 (0.45-0.52)                              | 0.47 (0.41-0.53)                                | 0.59 (0.28-1.27)      | 0.177                    |
| C2                             | 21.24 (17.0-26.86)                          | 21.25 (17.00-26.83)                          | 20.60 (16.86-27.45)                           | 22.73 (15.62-30.00)                             | 1.02 (0.76-1.38)      | 0.890                    |
| C3                             | 1.42 (1.07-1.82)                            | 1.47 (1.11-1.94)                             | 1.37 (1.11-1.84)                              | 1.16 (0.76-2.03)                                | 1.12 (0.85-1.47)      | 0.441                    |
| C4                             | 0.21 (0.17-0.26)                            | 0.20 (0.16-0.27)                             | 0.22 (0.16-0.29)                              | 0.20 (0.17-0.27)                                | 1.11 (0.82-1.50)      | 0.508                    |
| C5                             | 0.08 (0.06-0.11)                            | 0.08 (0.07-0.11)                             | 0.08 (0.07-0.12)                              | 0.11 (0.08-0.15)                                | 1.45 (1.07-1.96)      | 0.017*                   |
| C5:1                           | 0.01 (0.01-0.01)                            | 0.01 (0.01-0.01)                             | 0.01 (0.01-0.01)                              | 0.01 (0.01-0.01)                                | 0.68 (0.18-2.52)      | 0.562                    |
| Medium-chain (MC)              | 0.005 (0.004-0.007)                         | 0.005 (0.004-0.007)                          | 0.006 (0.004-0.007)                           | 0.005 (0.004-0.006)                             | 1.00 (0.74-1.37)      | 0.986                    |
| C6                             | 0.04 (0.04-0.05)                            | 0.04 (0.03-0.05)                             | 0.05 (0.04-0.06)                              | 0.05 (0.04-0.06)                                | 1.14 (0.83-1.57)      | 0.428                    |
| C6-DC                          | 0.10 (0.08-0.12)                            | 0.10 (0.08-0.12)                             | 0.10 (0.07-0.12)                              | 0.09 (0.07-0.12)                                | 0.97 (0.68-1.39)      | 0.875                    |
| C8                             | 0.06 (0.05-0.07)                            | 0.06 (0.04-0.07)                             | 0.06 (0.05-0.08)                              | 0.06 (0.05-0.07)                                | 1.16 (0.86-1.57)      | 0.323                    |
| C10                            | 0.08 (0.06-0.11)                            | 0.08 (0.06-0.11)                             | 0.08 (0.06-0.11)                              | 0.10 (0.06-0.10)                                | 0.97 (0.75-1.25)      | 0.799                    |
| C10:1                          | 0.05 (0.04-0.06)                            | 0.05 (0.04-0.06)                             | 0.05 (0.04-0.07)                              | 0.06 (0.06-0.06)                                | 2.11 (1.41-3.17)      | 3.18x10 <sup>-4</sup> ** |
| C10:2                          | 0.01 (0.01-0.01)                            | 0.01 (0.01-0.01)                             | 0.01 (0.01-0.01)                              | 0.01 (0.01-0.01)                                | 2.64 (1.38-5.08)      | 0.004*                   |
| Long-chain (LC)                | 0.12 (0.10-0.13)                            | 0.11 (0.10-0.13)                             | 0.12 (0.10-0.13)                              | 0.11 (0.09-0.12)                                | 0.75 (0.46-1.23)      | 0.259                    |
| C14                            | 0.22 (0.17-0.27)                            | 0.22 (0.17-0.27)                             | 0.21 (0.17-0.27)                              | 0.22 (0.15-0.23)                                | 1.00 (0.73-1.38)      | 0.991                    |
| C14:1                          | 0.13 (0.09-0.17)                            | 0.12 (0.09-0.17)                             | 0.13 (0.09-0.17)                              | 0.11 (0.07-0.13)                                | 0.85 (0.67-1.08)      | 0.190                    |
| C14-OH                         | 0.02 (0.01-0.02)                            | 0.01 (0.01-0.02)                             | 0.01 (0.01-0.02)                              | 0.01 (0.01-0.02)                                | 0.68 (0.52-0.89)      | 0.005*                   |
| C16                            | 2.83 (2.29-3.45)                            | 2.86 (2.20-3.53)                             | 2.74 (2.20-3.48)                              | 2.46 (1.76-3.07)                                | 0.94 (0.70-1.26)      | 0.656                    |
| C16:1                          | 0.21 (0.16-0.27)                            | 0.21 (0.15-0.27)                             | 0.19 (0.14-0.27)                              | 0.17 (0.10-0.23)                                | 0.86 (0.68-1.08)      | 0.183                    |
| C16-OH                         | 0.02 (0.02-0.03)                            | 0.02 (0.02-0.03)                             | 0.02 (0.02-0.03)                              | 0.02 (0.01-0.02)                                | 0.86 (0.66-1.13)      | 0.283                    |
| C18                            | 0.77 (0.62-0.95)                            | 0.76 (0.60-0.97)                             | 0.76 (0.59-0.94)                              | 0.86 (0.68-1.03)                                | 0.98 (0.71-1.36)      | 0.909                    |
| C18:1                          | 1.15 (0.92-1.42)                            | 1.17 (0.96-1.46)                             | 1.13 (0.84-1.37)                              | 1.30 (1.16-1.78)                                | 1.13 (0.81-1.57)      | 0.461                    |
| C18:1-OH                       | 0.02 (0.01-0.02)                            | 0.02 (0.01-0.02)                             | 0.02 (0.01-0.02)                              | 0.02 (0.02-0.02)                                | 0.96 (0.71-1.28)      | 0.757                    |
| C18:2                          | 0.15 (0.11-0.21)                            | 0.17 (0.12-0.23)                             | 0.17 (0.11-0.24)                              | 0.26 (0.18-0.40)                                | 1.47 (1.17-1.84)      | 0.001**                  |
| Total hydroxy (total OH)       | 0.05 (0.04-0.07)                            | 0.05 (0.04-0.07)                             | 0.05 (0.04-0.07)                              | 0.05 (0.04-0.06)                                | 0.84 (0.62-1.15)      | 0.277                    |
| <b>Amino Acids</b>             |                                             |                                              |                                               |                                                 |                       |                          |
| Arginine (ARG)                 | 8.0 (5.0-11.0)                              | 8.0 (6.0-11.0)                               | 9.0 (6.0-12.0)                                | 13.0 (7.0-18.0)                                 | 1.36 (1.09-1.69)      | 0.006*                   |
| Argininosuccinate (ASA)        | 0.06 (0.05-0.08)                            | 0.07 (0.05-0.09)                             | 0.07 (0.05-0.08)                              | 0.06 (0.04-0.07)                                | 1.04 (0.79-1.38)      | 0.772                    |
| Citrulline (CIT)               | 12.0 (10.0-15.0)                            | 12.0 (10.0-14.0)                             | 12.0 (10.0-15.0)                              | 12.5 (11.0-15.0)                                | 0.73 (0.49-1.08)      | 0.118                    |
| Glycine (GLY)                  | 384.0 (330.0-440.0)                         | 382.5 (327.0-459.0)                          | 380.0 (329.0-452.0)                           | 381.0 (299.0-473.0)                             | 1.26 (0.78-2.02)      | 0.344                    |
| Leucine (LEU)                  | 89.0 (76.0-104.0)                           | 91.0 (78.0-106.0)                            | 91.0 (79.0-106.0)                             | 113.5 (89.0-135.0)                              | 1.52 (0.96-2.41)      | 0.078                    |
| Methionine (MET)               | 19.0 (16.0-22.0)                            | 19.0 (16.0-22.0)                             | 20.0 (17.0-23.0)                              | 20.5 (18.0-25.0)                                | 1.29 (0.81-2.06)      | 0.276                    |
| Ornithine (ORN)                | 66.0 (55.0-82.0)                            | 68.0 (56.0-80.0)                             | 66.0 (55.0-85.0)                              | 78.5 (73.0-107.0)                               | 1.22 (0.83-1.79)      | 0.325                    |
| Phenylalanine (PHE)            | 49.0 (44.0-55.0)                            | 48.0 (43.0-54.0)                             | 48.0 (44.0-56.0)                              | 51.5 (49.0-57.0)                                | 0.90 (0.49-1.64)      | 0.719                    |
| Succinylacetone (SUAC)         | 0.39 (0.34-0.45)                            | 0.39 (0.34-0.46)                             | 0.40 (0.35-0.45)                              | 0.35 (0.28-0.44)                                | 0.95 (0.59-1.52)      | 0.829                    |
| Tyrosine (TYR)                 | 78.0 (62.0-98.0)                            | 78.0 (59.0-100.0)                            | 76.0 (62.0-98.0)                              | 101.5 (75.0-111.0)                              | 0.93 (0.69-1.26)      | 0.628                    |
| Valine (VAL)                   | 85.0 (73.0-101.0)                           | 86.0 (72.0-103.0)                            | 89.0 (71.0-100.0)                             | 103.0 (94.0-123.0)                              | 1.12 (0.72-1.75)      | 0.611                    |
| <b>Enzymes and Hormones</b>    |                                             |                                              |                                               |                                                 |                       |                          |
| 17-OHP                         | 6.0 (4.0-8.0)                               | 6.0 (4.0-8.0)                                | 6.0 (4.0-8.0)                                 | 6.0 (4.0-7.0)                                   | 1.02 (0.81-1.29)      | 0.872                    |
| Biotinidase                    | 128.0 (107.0-149.3)                         | 127.0 (110.0-149.0)                          | 120.0 (106.0-154.0)                           | 135.0 (105.0-174.0)                             | 1.18 (0.77-1.81)      | 0.449                    |
| GALT                           | 209.6 (153.7-269.1)                         | 200.2 (146.6-263.5)                          | 194.7 (142.9-260.0)                           | 209.2 (138.5-277.0)                             | 0.78 (0.60-1.01)      | 0.063                    |
| TSH                            | 8.0 (5.0-11.0)                              | 8.0 (5.0-12.0)                               | 8.0 (6.0-11.0)                                | 6.5 (2.0-10.0)                                  | 1.05 (0.88-1.25)      | 0.601                    |

IQR= Interquartile range (Q1 (25%)- Q3 (75%))

Odds ratios and p-values were estimated using separate ordinal logistic regression models.

<sup>†</sup> n=1,673 (85.8% of baseline population) responded to questions pertaining to the wheezing outcome on the 2-year INSPIRE questionnaire.\*Marginally significant (0.001 <  $\alpha$  < 0.10); \*\*Significant (Bonferroni correction < 0.001)

NOTE: Median (IQR) were calculated using non-transformed variables. Ordinal logistic regression was performed using log-transformed variables.

**Supplemental Table S5.** Comparison of newborn screening metabolites between number of wheezing episodes in the past 12 months for the 3-year study visit.

| Metabolite                     | No Wheezing Episodes<br>Median (IQR) | 1-3 Wheezing Episodes<br>Median (IQR) | 4-12 Wheezing Episodes<br>Median (IQR) | >12 Wheezing Episodes<br>Median (IQR) | OR<br>(95% CI)   | p-value                  |
|--------------------------------|--------------------------------------|---------------------------------------|----------------------------------------|---------------------------------------|------------------|--------------------------|
| <b>Sample Size<sup>†</sup></b> | <b>1,063 (79.3%)</b>                 | <b>211 (15.8%)</b>                    | <b>55 (4.1%)</b>                       | <b>11 (0.8%)</b>                      |                  |                          |
| Free carnitine (C0)            | 18.11 (14.07-23.30)                  | 18.63 (14.18-22.56)                   | 19.73 (14.46-26.95)                    | 16.03 (11.71-20.93)                   | 1.12 (0.79-1.59) | 0.525                    |
| Total carnitine (TC)           | 47.31 (38.85-58.08)                  | 48.71 (39.11-57.18)                   | 53.05 (39.36-66.42)                    | 45.18 (36.33-55.88)                   | 1.06 (0.70-1.62) | 0.772                    |
| <b>Acylcarnitines</b>          |                                      |                                       |                                        |                                       |                  |                          |
| Short-chain (SC)               | 0.49 (0.45-0.53)                     | 0.49 (0.45-0.53)                      | 0.50 (0.45-0.53)                       | 0.51 (0.48-0.54)                      | 0.75 (0.31-1.80) | 0.519                    |
| C2                             | 21.50 (17.00-27.10)                  | 21.42 (16.87-26.64)                   | 23.75 (16.50-30.45)                    | 23.09 (16.44-25.13)                   | 0.99 (0.70-1.40) | 0.943                    |
| C3                             | 1.43 (1.09-1.85)                     | 1.38 (1.10-1.83)                      | 1.48 (0.99-2.11)                       | 1.62 (1.14-2.01)                      | 0.93 (0.68-1.28) | 0.669                    |
| C4                             | 0.21 (0.17-0.26)                     | 0.20 (0.16-0.26)                      | 0.21 (0.16-0.25)                       | 0.26 (0.18-0.28)                      | 0.86 (0.60-1.23) | 0.412                    |
| C5                             | 0.08 (0.07-0.11)                     | 0.09 (0.07-0.11)                      | 0.09 (0.07-0.12)                       | 0.08 (0.07-0.13)                      | 1.42 (1.00-2.01) | 0.053                    |
| C5:1                           | 0.01 (0.01-0.01)                     | 0.01 (0.01-0.01)                      | 0.01 (0.01-0.01)                       | 0.01 (0.01-0.01)                      | 1.36 (0.30-6.28) | 0.693                    |
| Medium-chain (MC)              | 0.005 (0.004-0.007)                  | 0.005 (0.004-0.007)                   | 0.005 (0.004-0.007)                    | 0.007 (0.005-0.008)                   | 1.48 (1.03-2.14) | 0.035*                   |
| C6                             | 0.04 (0.04-0.06)                     | 0.04 (0.03-0.05)                      | 0.05 (0.04-0.07)                       | 0.05 (0.03-0.05)                      | 1.20 (0.82-1.74) | 0.347                    |
| C6-DC                          | 0.10 (0.08-0.12)                     | 0.10 (0.08-0.12)                      | 0.10 (0.08-0.14)                       | 0.11 (0.10-0.15)                      | 1.32 (0.87-2.01) | 0.199                    |
| C8                             | 0.06 (0.05-0.07)                     | 0.06 (0.05-0.08)                      | 0.07 (0.05-0.08)                       | 0.06 (0.05-0.08)                      | 1.46 (1.03-2.09) | 0.036*                   |
| C10                            | 0.08 (0.06-0.11)                     | 0.09 (0.06-0.12)                      | 0.10 (0.07-0.12)                       | 0.09 (0.09-0.12)                      | 1.39 (1.02-1.89) | 0.037*                   |
| C10:1                          | 0.05 (0.04-0.06)                     | 0.05 (0.04-0.06)                      | 0.05 (0.04-0.07)                       | 0.06 (0.05-0.07)                      | 2.56 (1.59-4.11) | 1.04x10 <sup>-4</sup> ** |
| C10:2                          | 0.01 (0.01-0.01)                     | 0.01 (0.01-0.01)                      | 0.01 (0.01-0.01)                       | 0.01 (0.01-0.01)                      | 2.56 (1.27-5.14) | 0.008*                   |
| Long-chain (LC)                | 0.12 (0.10-0.13)                     | 0.12 (0.10-0.13)                      | 0.11 (0.09-0.13)                       | 0.12 (0.11-0.12)                      | 0.81 (0.46-1.43) | 0.472                    |
| C14                            | 0.22 (0.17-0.27)                     | 0.22 (0.18-0.27)                      | 0.24 (0.18-0.32)                       | 0.21 (0.20-0.31)                      | 1.06 (0.73-1.54) | 0.777                    |
| C14:1                          | 0.13 (0.09-0.17)                     | 0.13 (0.09-0.18)                      | 0.16 (0.10-0.19)                       | 0.17 (0.13-0.28)                      | 1.15 (0.87-1.53) | 0.329                    |
| C14-OH                         | 0.02 (0.01-0.02)                     | 0.01 (0.01-0.02)                      | 0.02 (0.01-0.02)                       | 0.03 (0.01-0.03)                      | 1.11 (0.81-1.50) | 0.525                    |
| C16                            | 2.85 (2.29-3.51)                     | 2.89 (2.29-3.50)                      | 3.00 (2.28-3.74)                       | 2.74 (2.53-3.22)                      | 0.92 (0.65-1.29) | 0.621                    |
| C16:1                          | 0.22 (0.16-0.27)                     | 0.21 (0.16-0.27)                      | 0.23 (0.16-0.28)                       | 0.25 (0.19-0.31)                      | 0.93 (0.71-1.22) | 0.588                    |
| C16-OH                         | 0.02 (0.02-0.03)                     | 0.02 (0.02-0.03)                      | 0.02 (0.02-0.03)                       | 0.03 (0.02-0.04)                      | 1.15 (0.84-1.60) | 0.385                    |
| C18                            | 0.77 (0.61-0.96)                     | 0.78 (0.60-0.96)                      | 0.76 (0.60-1.06)                       | 0.68 (0.51-0.81)                      | 0.98 (0.67-1.43) | 0.901                    |
| C18:1                          | 1.16 (0.93-1.42)                     | 1.16 (0.93-1.39)                      | 1.26 (0.92-1.51)                       | 0.97 (0.86-1.20)                      | 0.95 (0.65-1.39) | 0.786                    |
| C18:1-OH                       | 0.02 (0.01-0.02)                     | 0.02 (0.01-0.02)                      | 0.02 (0.01-0.02)                       | 0.02 (0.02-0.02)                      | 0.95 (0.67-1.33) | 0.754                    |
| C18:2                          | 0.15 (0.11-0.21)                     | 0.16 (0.12-0.21)                      | 0.15 (0.11-0.25)                       | 0.13 (0.11-0.16)                      | 1.06 (0.80-1.40) | 0.685                    |
| Total hydroxy (total OH)       | 0.06 (0.04-0.07)                     | 0.05 (0.04-0.07)                      | 0.06 (0.05-0.07)                       | 0.08 (0.05-0.09)                      | 1.10 (0.76-1.60) | 0.603                    |
| <b>Amino Acids</b>             |                                      |                                       |                                        |                                       |                  |                          |
| Arginine (ARG)                 | 8.0 (5.0-11.0)                       | 8.5 (6.0-12.0)                        | 8.0 (5.0-12.0)                         | 12.0 (8.0-17.0)                       | 1.24 (0.97-1.60) | 0.090                    |
| Argininosuccinate (ASA)        | 0.07 (0.05-0.08)                     | 0.06 (0.05-0.09)                      | 0.07 (0.05-0.09)                       | 0.08 (0.05-0.10)                      | 1.21 (0.87-1.69) | 0.257                    |
| Citrulline (CIT)               | 12.0 (10.0-15.0)                     | 11.5 (10.0-14.5)                      | 13.0 (11.0-16.0)                       | 12.5 (11.0-17.0)                      | 1.13 (0.71-1.81) | 0.601                    |
| Glycine (GLY)                  | 380.0 (325.0-440.0)                  | 380.5 (321.5-445.5)                   | 423.0 (366.0-494.0)                    | 388.5 (355.0-447.0)                   | 1.57 (0.90-2.76) | 0.114                    |
| Leucine (LEU)                  | 89.0 (76.0-104.0)                    | 93.0 (76.5-106.0)                     | 97.0 (79.0-119.0)                      | 87.0 (77.0-98.0)                      | 1.69 (0.99-2.90) | 0.055                    |
| Methionine (MET)               | 19.0 (16.0-22.0)                     | 20.0 (17.0-23.0)                      | 19.0 (17.0-22.0)                       | 20.0 (18.0-29.0)                      | 2.11 (1.22-3.66) | 0.007*                   |
| Ornithine (ORN)                | 66.0 (55.0-82.0)                     | 67.0 (56.0-81.0)                      | 75.0 (60.0-88.5)                       | 57.0 (54.0-79.0)                      | 1.35 (0.86-2.13) | 0.190                    |
| Phenylalanine (PHE)            | 48.0 (43.0-55.0)                     | 48.5 (42.0-56.0)                      | 50.0 (46.0-58.0)                       | 46.5 (45.0-59.0)                      | 1.37 (0.67-2.81) | 0.390                    |
| Succinylacetone (SUAC)         | 0.39 (0.34-0.46)                     | 0.40 (0.34-0.46)                      | 0.39 (0.36-0.46)                       | 0.38 (0.32-0.42)                      | 1.10 (0.64-1.89) | 0.731                    |
| Tyrosine (TYR)                 | 78.0 (62.0-98.0)                     | 75.5 (61.5-98.0)                      | 87.0 (68.0-109.0)                      | 82.5 (74.0-94.0)                      | 1.07 (0.74-1.53) | 0.728                    |
| Valine (VAL)                   | 86.0 (73.0-101.0)                    | 86.0 (71.0-104.3)                     | 92.0 (75.0-112.0)                      | 84.0 (72.0-92.0)                      | 1.20 (0.71-2.03) | 0.491                    |
| <b>Enzymes and Hormones</b>    |                                      |                                       |                                        |                                       |                  |                          |
| 17-OHP                         | 6.0 (4.0-8.0)                        | 6.0 (4.0-8.0)                         | 6.0 (4.0-7.0)                          | 6.0 (5.0-7.0)                         | 0.97 (0.73-1.27) | 0.796                    |
| Biotinidase                    | 127.0 (107.0-148.0)                  | 126.0 (109.5-149.5)                   | 124.0 (108.0-144.0)                    | 140.0 (116.0-184.0)                   | 1.14 (0.68-1.91) | 0.615                    |
| GALT                           | 209.2 (152.6-269.8)                  | 204.7 (147.3-256.6)                   | 193.8 (153.5-268.1)                    | 234.5 (211.6-286.5)                   | 0.97 (0.71-1.33) | 0.867                    |
| TSH                            | 8.0 (5.0-11.0)                       | 8.0 (5.0-11.5)                        | 8.0 (6.0-11.0)                         | 8.0 (6.0-14.0)                        | 1.04 (0.84-1.28) | 0.715                    |

IQR= Interquartile range (Q1 (25%)- Q3 (75%))

Odds ratios and p-values were estimated using separate ordinal logistic regression models.

<sup>†</sup> n=1,340 (68.7% of baseline population) responded to questions pertaining to the wheezing outcome on the 3-year INSPIRE questionnaire.\*Marginally significant (0.001 <  $\alpha$  < 0.05); \*\*Significant (Bonferroni correction < 0.001)

NOTE: Median (IQR) were calculated using non-transformed variables. Ordinal logistic regression was performed using log-transformed variables.

**Supplemental Table S6.** Odds ratios for the association of newborn screening metabolites with the number of wheezing episodes in the past 12 months for the 1-year, 2-year, and 3-year study visits.

| Metabolite                  | Year 1 (n=1,761) |         | Year 2 (n=1,673) |                          | Year 3 (n=1,340) |                          |
|-----------------------------|------------------|---------|------------------|--------------------------|------------------|--------------------------|
|                             | OR (95% CI)      | p-value | OR (95% CI)      | p-value                  | OR (95% CI)      | p-value                  |
| Free carnitine (C0)         | 1.22 (0.92-1.61) | 0.166   | 1.28 (0.95-1.72) | 0.108                    | 1.12 (0.79-1.59) | 0.525                    |
| Total carnitine (TC)        | 1.09 (0.78-1.52) | 0.616   | 1.17 (0.82-1.67) | 0.390                    | 1.06 (0.70-1.62) | 0.772                    |
| <b>Acylcarnitines</b>       |                  |         |                  |                          |                  |                          |
| Short-chain (SC)            |                  |         |                  |                          |                  |                          |
| C2                          | 0.69 (0.34-1.43) | 0.321   | 0.59 (0.28-1.27) | 0.177                    | 0.75 (0.31-1.80) | 0.519                    |
| C3                          | 0.98 (0.74-1.29) | 0.858   | 1.02 (0.76-1.38) | 0.890                    | 0.99 (0.70-1.40) | 0.943                    |
| C4                          | 1.32 (1.02-1.72) | 0.036*  | 1.12 (0.85-1.47) | 0.441                    | 0.93 (0.68-1.28) | 0.669                    |
| C5                          | 1.09 (0.82-1.45) | 0.551   | 1.11 (0.82-1.50) | 0.508                    | 0.86 (0.60-1.23) | 0.412                    |
| C5:1                        | 1.42 (1.07-1.89) | 0.016*  | 1.45 (1.07-1.96) | 0.017*                   | 1.42 (1.00-2.01) | 0.053                    |
| C5:1                        | 1.42 (0.42-4.81) | 0.574   | 0.68 (0.18-2.52) | 0.562                    | 1.36 (0.30-6.28) | 0.693                    |
| Medium-chain (MC)           |                  |         |                  |                          |                  |                          |
| C6                          | 1.03 (0.77-1.38) | 0.844   | 1.00 (0.74-1.37) | 0.986                    | 1.48 (1.03-2.14) | 0.035*                   |
| C6                          | 1.20 (0.89-1.62) | 0.244   | 1.14 (0.83-1.57) | 0.428                    | 1.20 (0.82-1.74) | 0.347                    |
| C6-DC                       | 1.40 (1.00-1.96) | 0.053   | 0.97 (0.68-1.39) | 0.875                    | 1.32 (0.87-2.01) | 0.199                    |
| C8                          | 1.11 (0.84-1.47) | 0.476   | 1.16 (0.86-1.57) | 0.323                    | 1.46 (1.03-2.09) | 0.036*                   |
| C10                         | 0.96 (0.75-1.22) | 0.733   | 0.97 (0.75-1.25) | 0.799                    | 1.39 (1.02-1.89) | 0.037*                   |
| C10:1                       | 1.37 (0.94-2.00) | 0.100   | 2.11 (1.41-3.17) | 3.18x10 <sup>-4</sup> ** | 2.56 (1.59-4.11) | 1.04x10 <sup>-4</sup> ** |
| C10:2                       | 1.82 (0.97-3.42) | 0.061   | 2.64 (1.38-5.08) | 0.004*                   | 2.56 (1.27-5.14) | 0.008*                   |
| Long-chain (LC)             |                  |         |                  |                          |                  |                          |
| C14                         | 0.76 (0.48-1.21) | 0.255   | 0.75 (0.46-1.23) | 0.259                    | 0.81 (0.46-1.43) | 0.472                    |
| C14                         | 1.05 (0.78-1.42) | 0.736   | 1.00 (0.73-1.38) | 0.991                    | 1.06 (0.73-1.54) | 0.777                    |
| C14:1                       | 0.91 (0.73-1.14) | 0.412   | 0.85 (0.67-1.08) | 0.190                    | 1.15 (0.87-1.53) | 0.329                    |
| C14-OH                      | 0.88 (0.69-1.12) | 0.301   | 0.68 (0.52-0.89) | 0.005*                   | 1.11 (0.81-1.50) | 0.525                    |
| C16                         | 0.89 (0.67-1.17) | 0.400   | 0.94 (0.70-1.26) | 0.656                    | 0.92 (0.65-1.29) | 0.621                    |
| C16:1                       | 0.94 (0.75-1.18) | 0.586   | 0.86 (0.68-1.08) | 0.183                    | 0.93 (0.71-1.22) | 0.588                    |
| C16-OH                      | 0.88 (0.69-1.14) | 0.333   | 0.86 (0.66-1.13) | 0.283                    | 1.15 (0.84-1.60) | 0.385                    |
| C18                         | 0.93 (0.68-1.27) | 0.649   | 0.98 (0.71-1.36) | 0.909                    | 0.98 (0.67-1.43) | 0.901                    |
| C18:1                       | 1.08 (0.79-1.47) | 0.629   | 1.13 (0.81-1.57) | 0.461                    | 0.95 (0.65-1.39) | 0.786                    |
| C18:1-OH                    | 0.97 (0.74-1.28) | 0.836   | 0.96 (0.71-1.28) | 0.757                    | 0.95 (0.67-1.33) | 0.754                    |
| C18:2                       | 1.38 (1.12-1.71) | 0.003*  | 1.47 (1.17-1.84) | 0.001**                  | 1.06 (0.80-1.40) | 0.685                    |
| Total hydroxy (total OH)    | 0.91 (0.68-1.22) | 0.538   | 0.84 (0.62-1.15) | 0.277                    | 1.10 (0.76-1.60) | 0.603                    |
| <b>Amino Acids</b>          |                  |         |                  |                          |                  |                          |
| Arginine (ARG)              | 1.01 (0.83-1.24) | 0.911   | 1.36 (1.09-1.69) | 0.006*                   | 1.24 (0.97-1.60) | 0.090                    |
| Argininosuccinate (ASA)     | 1.38 (1.06-1.79) | 0.017*  | 1.04 (0.79-1.38) | 0.772                    | 1.21 (0.87-1.69) | 0.257                    |
| Citrulline (CIT)            | 0.85 (0.59-1.24) | 0.405   | 0.73 (0.49-1.08) | 0.118                    | 1.13 (0.71-1.81) | 0.601                    |
| Glycine (GLY)               | 1.33 (0.85-2.07) | 0.211   | 1.26 (0.78-2.02) | 0.344                    | 1.57 (0.90-2.76) | 0.114                    |
| Leucine (LEU)               | 1.76 (1.14-2.73) | 0.011*  | 1.52 (0.96-2.41) | 0.078                    | 1.69 (0.99-2.90) | 0.055                    |
| Methionine (MET)            | 1.13 (0.73-1.74) | 0.595   | 1.29 (0.81-2.06) | 0.276                    | 2.11 (1.22-3.66) | 0.007*                   |
| Ornithine (ORN)             | 1.34 (0.93-1.92) | 0.118   | 1.22 (0.83-1.79) | 0.325                    | 1.35 (0.86-2.13) | 0.190                    |
| Phenylalanine (PHE)         | 1.31 (0.64-1.99) | 0.668   | 0.90 (0.49-1.64) | 0.719                    | 1.37 (0.67-2.81) | 0.390                    |
| Succinylacetone (SUAC)      | 1.39 (0.90-2.14) | 0.135   | 0.95 (0.59-1.52) | 0.829                    | 1.10 (0.64-1.89) | 0.731                    |
| Tyrosine (TYR)              | 0.92 (0.69-1.22) | 0.561   | 0.93 (0.69-1.26) | 0.628                    | 1.07 (0.74-1.53) | 0.728                    |
| Valine (VAL)                | 1.25 (0.82-1.89) | 0.301   | 1.12 (0.72-1.75) | 0.611                    | 1.20 (0.71-2.03) | 0.491                    |
| <b>Enzymes and Hormones</b> |                  |         |                  |                          |                  |                          |
| 17-OHP                      | 0.98 (0.79-1.22) | 0.853   | 1.02 (0.81-1.29) | 0.872                    | 0.97 (0.73-1.27) | 0.796                    |
| Biotinidase                 | 1.06 (0.72-1.57) | 0.769   | 1.18 (0.77-1.81) | 0.449                    | 1.14 (0.68-1.91) | 0.615                    |
| GALT                        | 0.82 (0.64-1.05) | 0.122   | 0.78 (0.60-1.01) | 0.063                    | 0.97 (0.71-1.33) | 0.867                    |
| TSH                         | 1.09 (0.92-1.29) | 0.310   | 1.05 (0.88-1.25) | 0.601                    | 1.04 (0.84-1.28) | 0.715                    |

Odds ratios and p-values were estimated using separate ordinal logistic regression models.

\*Marginally significant ( $0.001 < \alpha < 0.05$ ); \*\*Significant (Bonferroni correction  $< 0.001$ )

**Supplemental Figure S1.** Distribution of C10:1 and C18:2 at years 1, 2, and 3.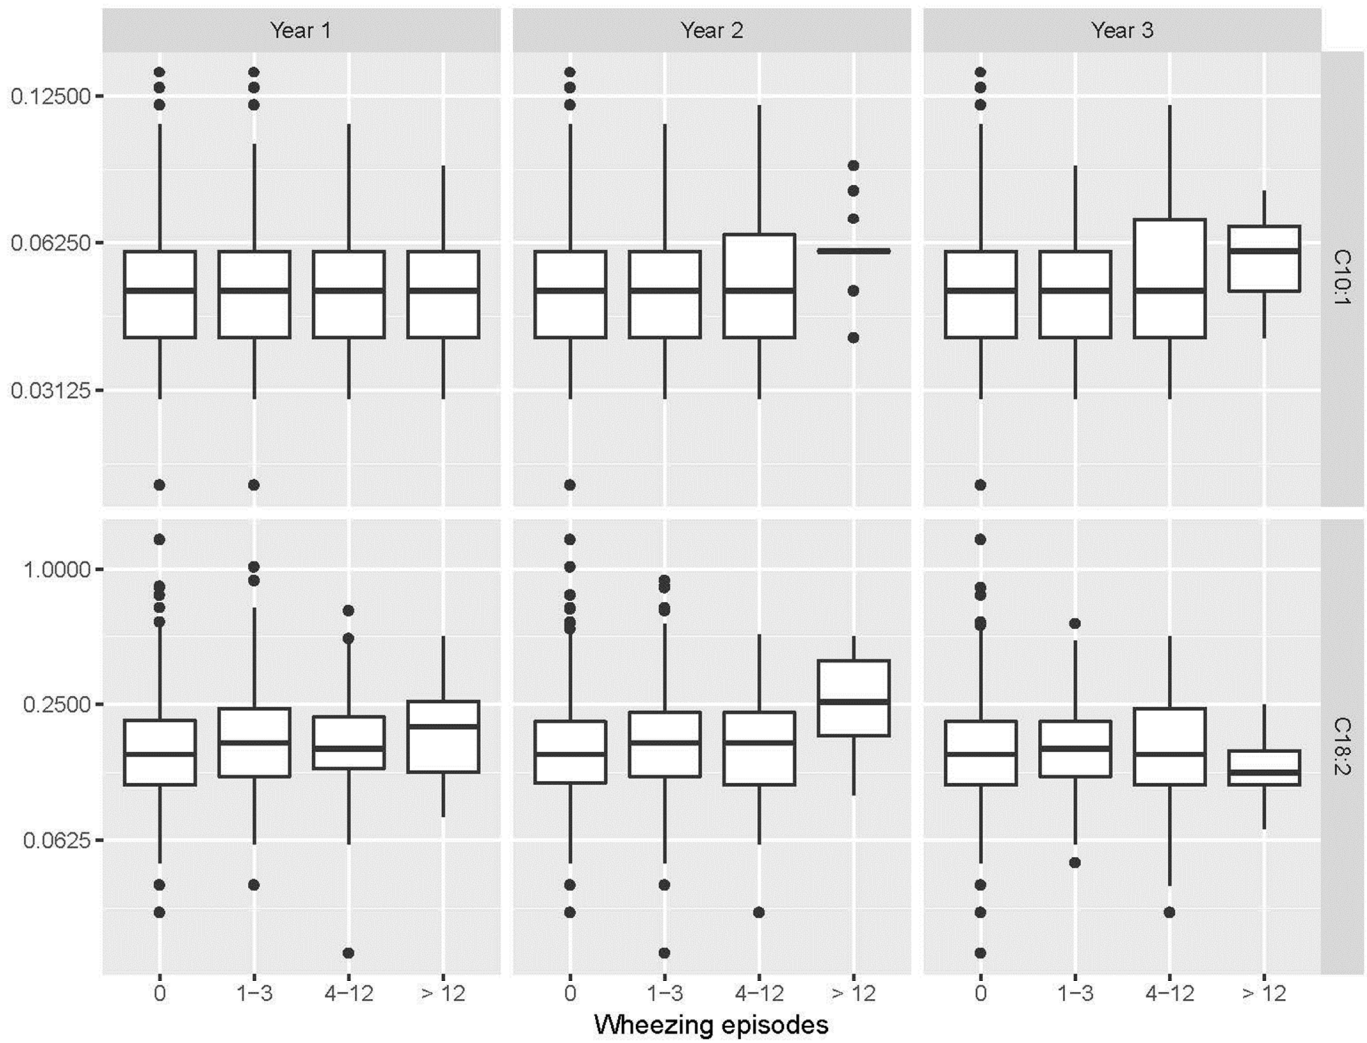

Rectangles represent IQRs for C10:1 and C18:2 within each study year. The horizontal line within the rectangle is the median value. Vertical lines indicate 1.5xIQR and dots indicate outliers (i.e., individuals with metabolite levels  $\geq 3$ xIQR above the third quartile or  $\leq 3$ xIQR below the first quartile).

**Supplemental Table S7.** Summary of effect estimates for comparison of newborn screening metabolites between children with no wheezing episodes and those with >4 wheezing episodes in the past 12 months for the 1-, 2-, and 3-year study visits.

| Metabolite                  | Year 1 (n=1,761)  |         | Year2 (n=1,673)   |                          | Year 3 (n=1,340)  |         |
|-----------------------------|-------------------|---------|-------------------|--------------------------|-------------------|---------|
|                             | OR (95% CI)       | p-value | OR (95% CI)       | p-value                  | OR (95% CI)       | p-value |
| Free carnitine (C0)         | 1.51 (0.91-2.51)  | 0.109   | 1.61 (0.94-2.74)  | 0.082                    | 1.54 (0.80-2.97)  | 0.196   |
| Total carnitine (TC)        | 1.12 (0.61-2.06)  | 0.720   | 1.34 (0.70-2.56)  | 0.373                    | 1.77 (0.80-3.94)  | 0.161   |
| <b>Acylcarnitines</b>       |                   |         |                   |                          |                   |         |
| Short-chain (SC)            |                   |         |                   |                          |                   |         |
| C2                          | 0.38 (0.12-1.23)  | 0.106   | 0.35 (0.10-1.20)  | 0.096                    | 1.06 (0.19-5.92)  | 0.944   |
| C3                          | 0.91 (0.55-1.51)  | 0.701   | 1.06 (0.61-1.82)  | 0.841                    | 1.57 (0.79-3.13)  | 0.203   |
| C4                          | 1.06 (0.66-1.70)  | 0.820   | 0.86 (0.52-1.41)  | 0.543                    | 1.08 (0.58-1.99)  | 0.818   |
| C5                          | 0.96 (0.57-1.62)  | 0.883   | 1.30 (0.75-2.23)  | 0.350                    | 0.96 (0.49-1.90)  | 0.905   |
| C5:1                        | 1.29 (0.77-2.17)  | 0.337   | 2.23 (1.31-3.81)  | 0.003*                   | 2.05 (1.06-3.96)  | 0.032*  |
| C6                          | 2.28 (0.30-17.30) | 0.424   | 0.34 (0.03-3.46)  | 0.361                    | 3.22 (0.22-46.76) | 0.391   |
| Medium-chain (MC)           |                   |         |                   |                          |                   |         |
| C6                          | 1.01 (0.59-1.71)  | 0.985   | 1.22 (0.70-2.12)  | 0.487                    | 1.71 (0.86-3.40)  | 0.124   |
| C6-DC                       | 1.00 (0.58-1.72)  | 1.000   | 1.75 (0.99-3.10)  | 0.053                    | 2.58 (1.27-5.24)  | 0.009*  |
| C8                          | 1.17 (0.63-2.18)  | 0.614   | 0.82 (0.43-1.55)  | 0.539                    | 1.79 (0.81-3.97)  | 0.153   |
| C10                         | 1.16 (0.70-1.91)  | 0.577   | 1.67 (0.99-2.84)  | 0.057                    | 2.55 (1.32-4.93)  | 0.005*  |
| C10:1                       | 1.05 (0.67-1.63)  | 0.843   | 1.18 (0.74-1.88)  | 0.479                    | 2.27 (1.27-4.05)  | 0.006*  |
| C10:2                       | 1.32 (0.67-2.61)  | 0.420   | 4.30 (2.08-8.90)  | 8.30x10 <sup>-5</sup> ** | 3.55 (1.49-8.48)  | 0.004*  |
| C14                         | 1.08 (0.30-3.85)  | 0.911   | 2.92 (0.95-8.96)  | 0.062                    | 2.78 (0.81-9.53)  | 0.104   |
| Long-chain (LC)             |                   |         |                   |                          |                   |         |
| C14                         | 0.48 (0.22-1.06)  | 0.069   | 0.51 (0.22-1.20)  | 0.123                    | 0.68 (0.24-1.92)  | 0.470   |
| C14:1                       | 0.87 (0.50-1.49)  | 0.610   | 0.96 (0.54-1.70)  | 0.883                    | 2.01 (0.94-4.27)  | 0.071   |
| C14-OH                      | 0.72 (0.48-1.09)  | 0.118   | 0.81 (0.53-1.25)  | 0.344                    | 1.78 (1.02-3.11)  | 0.041*  |
| C16                         | 0.68 (0.43-1.08)  | 0.099   | 0.74 (0.46-1.20)  | 0.228                    | 2.02 (1.13-3.62)  | 0.018*  |
| C16:1                       | 0.76 (0.47-1.22)  | 0.254   | 0.83 (0.50-1.38)  | 0.464                    | 1.26 (0.63-2.53)  | 0.519   |
| C16-OH                      | 0.79 (0.54-1.15)  | 0.216   | 0.73 (0.50-1.07)  | 0.104                    | 1.23 (0.69-2.17)  | 0.484   |
| C18                         | 0.73 (0.46-1.15)  | 0.179   | 0.72 (0.45-1.16)  | 0.181                    | 1.91 (1.00-3.63)  | 0.049*  |
| C18:1                       | 0.81 (0.46-1.42)  | 0.460   | 1.05 (0.58-1.89)  | 0.872                    | 1.08 (0.52-2.24)  | 0.833   |
| C18:1-OH                    | 0.89 (0.51-1.54)  | 0.673   | 1.134 (0.63-2.05) | 0.675                    | 1.12 (0.54-2.33)  | 0.767   |
| C18:2                       | 0.85 (0.52-1.38)  | 0.503   | 1.15 (0.68-1.95)  | 0.603                    | 1.25 (0.64-2.42)  | 0.519   |
| Total hydroxy (total OH)    | 1.40 (0.95-2.07)  | 0.089   | 1.67 (1.11-2.52)  | 0.014*                   | 0.99 (0.59-1.65)  | 0.958   |
|                             | 0.73 (0.43-1.22)  | 0.225   | 0.86 (0.50-1.50)  | 0.598                    | 2.21 (1.05-4.64)  | 0.036*  |
| <b>Amino Acids</b>          |                   |         |                   |                          |                   |         |
| Arginine (ARG)              | 1.36 (0.94-1.98)  | 0.108   | 1.65 (1.12-2.43)  | 0.012*                   | 1.58 (0.98-2.54)  | 0.060   |
| Argininosuccinate (ASA)     | 1.37 (0.85-2.21)  | 0.196   | 1.08 (0.66-1.79)  | 0.754                    | 1.59 (0.84-3.03)  | 0.156   |
| Citrulline (CIT)            | 1.00 (0.50-1.97)  | 0.988   | 1.09 (0.54-2.23)  | 0.811                    | 2.34 (0.97-5.64)  | 0.058   |
| Glycine (GLY)               | 1.24 (0.56-2.75)  | 0.605   | 1.40 (0.59-3.33)  | 0.447                    | 5.21 (1.72-15.79) | 0.004*  |
| Leucine (LEU)               | 1.86 (0.85-4.09)  | 0.124   | 2.95 (1.32-6.57)  | 0.008*                   | 2.61 (0.96-7.10)  | 0.061   |
| Methionine (MET)            | 1.47 (0.67-3.23)  | 0.344   | 3.03 (1.31-6.98)  | 0.009*                   | 3.12 (1.13-8.62)  | 0.028*  |
| Ornithine (ORN)             | 1.69 (0.88-3.23)  | 0.113   | 1.63 (0.83-3.21)  | 0.154                    | 2.01 (0.87-4.65)  | 0.102   |
| Phenylalanine (PHE)         | 0.70 (0.25-1.99)  | 0.507   | 1.99 (0.66-6.03)  | 0.225                    | 3.23 (0.80-13.02) | 0.099   |
| Succinylacetone (SUAC)      | 1.49 (0.67-3.30)  | 0.329   | 1.01 (0.44-2.36)  | 0.974                    | 1.09 (0.39-3.03)  | 0.873   |
| Tyrosine (TYR)              | 0.81 (0.48-1.36)  | 0.420   | 1.14 (0.66-1.97)  | 0.640                    | 1.91 (0.95-3.83)  | 0.068   |
| Valine (VAL)                | 1.14 (0.54-2.43)  | 0.726   | 1.84 (0.84-4.04)  | 0.130                    | 2.09 (0.79-5.54)  | 0.137   |
| <b>Enzymes and Hormones</b> |                   |         |                   |                          |                   |         |
| 17-OHP                      | 0.90 (0.60-1.34)  | 0.600   | 0.99 (0.65-1.50)  | 0.964                    | 0.85 (0.51-1.43)  | 0.551   |
| Biotinidase                 | 1.48 (0.71-3.07)  | 0.298   | 0.88 (0.42-1.86)  | 0.741                    | 1.27 (0.48-3.39)  | 0.631   |
| GALT                        | 0.85 (0.54-1.33)  | 0.466   | 0.72 (0.45-1.17)  | 0.184                    | 1.07 (0.59-1.93)  | 0.820   |
| TSH                         | 1.26 (0.91-1.73)  | 0.161   | 1.09 (0.78-1.51)  | 0.620                    | 1.13 (0.75-1.68)  | 0.567   |

Odds ratios and p-values were estimated using univariate logistic regression models.

\*Marginally significant (0.001 <  $\alpha$  < 0.05); \*\*Significant (Bonferroni correction < 0.001)
